# Supplementary material for: Different states of priority recruit different neural representations in visual working memory
Source: PLoS Biol. 2020 Jun 29;18(6):e3000769. doi: 10.1371/journal.pbio.3000769 (PMC7351225; doi:10.1371/journal.pbio.3000769)
Supplement: S3 Table — IPS, intraparietal sulcus; PMI, prioritized memory item. (XLSX) [file pbio.3000769.s009.xlsx]

## Sheet: Sheet1
Train Time Point		Test Time point
		0	2	4	6	8	10	12	14	16	18
	0	0.6784	0.8108	0.7522	0.2636	0.1884	0.0306	0.195	0.3844	0.7966	0.8244
	2	0.639	0.9556	0.179	0.1454	0.4494	0.067	0.7358	0.77	0.5572	0.314
	4	0.5168	0.977	0.0632	0.0104	0.0588	0.5534	0.8236	0.4718	0.158	0.1992
	6	0.9964	0.3882	0.0236	0.01	0.1354	0.8772	0.292	0.6358	0.6778	0.5064
	8	0.8464	0.3806	0.0106	0.0454	0.5928	0.496	0.7198	0.779	0.2148	0.6896
	10	0.6904	0.7274	0.2718	0.4264	0.6642	0.0694	0.0098	0.0882	0.0002	0.0794
	12	0.6312	0.9484	0.6274	0.96	0.8074	0.0198	0.1418	0.6182	0.1426	0.1188
	14	0.5226	0.5032	0.5702	0.1858	0.0802	0.4012	0.9532	0.8202	0.291	0.0722
	16	0.274	0.4622	0.6194	0.4932	0.3092	0.0178	0.2788	0.3324	0.1278	0.2626
	18	0.2482	0.206	0.707	0.8376	0.9998	0.1068	0.3654	0.1368	0.1762	0.282
